# Supplementary material
Source: publisher site journal article supplement (https://www.dovepress.com/article/290643)
Supplement: Supplementary file 1 [file get_supplementary_file.php]

## APPENDIX

**Table A1. Search strategy**

| Database             | Search strategy                                                                                                                                                                                                                                                                                                                                                                                       | Number of records |
|----------------------|-------------------------------------------------------------------------------------------------------------------------------------------------------------------------------------------------------------------------------------------------------------------------------------------------------------------------------------------------------------------------------------------------------|-------------------|
| PubMed               | ("Patient Readmission"[Mesh]) AND "Economic Competition"[Mesh]                                                                                                                                                                                                                                                                                                                                        | 5                 |
| EmBase               | (exp competition/ OR Herfindahl-Hirschman Index.mp. OR Hirschman-Herfindahl Index.mp) AND exp hospital readmission/                                                                                                                                                                                                                                                                                   | 21                |
| Wiley Online Library | "hospital" in Abstract and "competition OR "market concentration" OR "Herfindahl-Hirschman Index" OR "Hirschman-Herfindahl Index" OR "Herfindahl-Hirschman Index" OR HHI" in Abstract and "readmission OR re-admission" in Abstract                                                                                                                                                                   | 99                |
| Web of science       | (TS=(health* market) OR TS=(health* institution) OR TS=(hospital)) AND (TS=(Competition) OR TS=(Market concentration)) AND (TS=(readmission) OR TS=(re-admission))                                                                                                                                                                                                                                    | 51                |
| Scopus               | (TITLE-ABS-KEY(Competition) OR TITLE-ABS-KEY(Market concentration) OR TITLE-ABS-KEY(Herfindahl-Hirschman Index) OR TITLE-ABS-KEY(Hirschman-Herfindahl Index) OR TITLE-ABS-KEY(Herfindahl-Hirschman Index) OR TITLE-ABS-KEY(HHI)) AND (TITLE-ABS-KEY(health* market) OR TITLE-ABS-KEY(health* institution) OR TITLE-ABS-KEY(hospital)) AND (TITLE-ABS-KEY(readmission) OR TITLE-ABS-KEY(re-admission)) | 59                |
| JSTOR                | (((((health* market) OR (health* institution) OR hospital) AND (competition OR (market concentration) OR (Herfindahl-Hirschman Index) OR (Hirschman-Herfindahl Index) OR (Herfindahl-Hirschman Index) OR HHI)) AND (readmission OR re-admission))                                                                                                                                                     | 726               |

**Table A2. Items of Appraisal tool for Cross-Sectional Studies (AXIS)**

|                     | Question                                                                                                                                              | Yes/No/Don't know |
|---------------------|-------------------------------------------------------------------------------------------------------------------------------------------------------|-------------------|
| <b>Introduction</b> |                                                                                                                                                       |                   |
| 1                   | Were the aims/objectives of the study clear?                                                                                                          |                   |
| <b>Methods</b>      |                                                                                                                                                       |                   |
| 2                   | Was the study design appropriate for the stated aim(s)?                                                                                               |                   |
| 3                   | Was the sample size justified?                                                                                                                        |                   |
| 4                   | Was the target/reference population clearly defined? (Is it clear who the research was about?)                                                        |                   |
| 5                   | Was the sample frame taken from an appropriate population base so that it closely represented the target/reference population under investigation?    |                   |
| 6                   | Was the selection process likely to select subjects/participants that were representative of the target/reference population under investigation?     |                   |
| 7                   | Were measures undertaken to address and categorise non-responders?                                                                                    |                   |
| 8                   | Were the risk factor and outcome variables measured appropriate to the aims of the study?                                                             |                   |
| 9                   | Were the risk factor and outcome variables measured correctly using instruments/measurements that had been trialled, piloted or published previously? |                   |
| 10                  | Is it clear what was used to determine statistical significance and/or precision estimates? (e.g., p-values, confidence intervals)                    |                   |
| 11                  | Were the methods (including statistical methods) sufficiently described to enable them to be repeated?                                                |                   |
| <b>Results</b>      |                                                                                                                                                       |                   |
| 12                  | Were the basic data adequately described?                                                                                                             |                   |
| 13                  | Does the response rate raise concerns about non-response bias?                                                                                        |                   |
| 14                  | If appropriate, was information about non-responders described?                                                                                       |                   |
| 15                  | Were the results internally consistent?                                                                                                               |                   |
| 16                  | Were the results presented for all the analyses described in the methods?                                                                             |                   |
| <b>Discussion</b>   |                                                                                                                                                       |                   |
| 17                  | Were the authors' discussions and conclusions justified by the results?                                                                               |                   |
| 18                  | Were the limitations of the study discussed?                                                                                                          |                   |
| <b>Other</b>        |                                                                                                                                                       |                   |
| 19                  | Were there any funding sources or conflicts of interest that may affect the authors' interpretation of the results?                                   |                   |
| 20                  | Was ethical approval or consent of participants attained?                                                                                             |                   |

Note: This critical appraisal tool was developed by Downes MJ et al. (2016)<sup>1</sup>.

Table A3. Appraisal for included studies using AXIS tool

| Author and year         | Introd<br>uction | Methods |   |   |    |    |   |   |   |    |    | Results |     |    |    |    | Discussion |    | Other |    | AXIS<br>Score<br>/20 |
|-------------------------|------------------|---------|---|---|----|----|---|---|---|----|----|---------|-----|----|----|----|------------|----|-------|----|----------------------|
|                         | 1                | 2       | 3 | 4 | 5  | 6  | 7 | 8 | 9 | 10 | 11 | 12      | 13* | 14 | 15 | 16 | 17         | 18 | 19*   | 20 |                      |
| Palangkaraya et al 2013 | Y                | Y       | Y | Y | DK | DK | N | Y | N | Y  | Y  | Y       | N   | N  | Y  | Y  | Y          | Y  | DK    | Y  | 14                   |
| Kim et al 2015          | Y                | Y       | Y | Y | Y  | Y  | N | Y | Y | Y  | Y  | Y       | N   | N  | Y  | Y  | Y          | Y  | N     | Y  | 18                   |
| Kim et al 2016          | Y                | Y       | Y | Y | Y  | Y  | N | Y | N | Y  | Y  | Y       | N   | N  | Y  | Y  | Y          | Y  | N     | Y  | 17                   |
| Liao et al 2018         | Y                | Y       | Y | Y | Y  | Y  | N | Y | N | Y  | Y  | Y       | N   | N  | Y  | Y  | Y          | Y  | N     | Y  | 17                   |
| Ho et al 2000           | Y                | Y       | Y | Y | Y  | Y  | Y | Y | Y | Y  | Y  | Y       | N   | Y  | Y  | Y  | Y          | Y  | N     | Y  | 20                   |
| Dunn et al 2018         | Y                | Y       | Y | Y | DK | DK | N | Y | Y | Y  | Y  | Y       | N   | N  | Y  | Y  | Y          | Y  | DK    | Y  | 15                   |
| Kessler et al 2000      | Y                | Y       | Y | Y | Y  | Y  | Y | Y | Y | Y  | Y  | Y       | N   | Y  | Y  | Y  | Y          | Y  | N     | Y  | 20                   |
| Kessler et al 2005      | Y                | Y       | Y | Y | Y  | Y  | Y | Y | Y | Y  | Y  | Y       | N   | Y  | Y  | Y  | Y          | N  | DK    | Y  | 18                   |
| Chou et al 2014         | Y                | Y       | Y | Y | Y  | Y  | Y | Y | Y | Y  | Y  | Y       | N   | Y  | Y  | Y  | Y          | N  | N     | Y  | 19                   |
| <b>Mean</b>             |                  |         |   |   |    |    |   |   |   |    |    |         |     |    |    |    |            |    |       |    | 17.6                 |
| <b>SD</b>               |                  |         |   |   |    |    |   |   |   |    |    |         |     |    |    |    |            |    |       |    | 1.9                  |

Note: Y="Yes", N="No", DK="Don't know". Items in red are those that missed criteria.

\*Item is reverse scored (i.e., no is a positive)

## Reference

1. Downes MJ, Brennan ML, Williams HC, Dean RS. Development of a critical appraisal tool to assess the quality of cross-sectional studies (AXIS). *BMJ Open*. 2016;6(12):e011458. doi:10.1136/bmjopen-2016-011458
